# Supplementary material for: Correction: Elucidation of the RamA Regulon in Klebsiella pneumoniae Reveals a Role in LPS Regulation
Source: PubMed Central journal article supplement (PMC4864251; doi:10.1371/journal.ppat.1005649), 2016-05-11
Supplement: ppat.1005649.s001.pdf [file ppat.1005649.s001.pdf]

# EMSA Analyses of RamA-Regulated promoters *yrbF* and *ybhT*

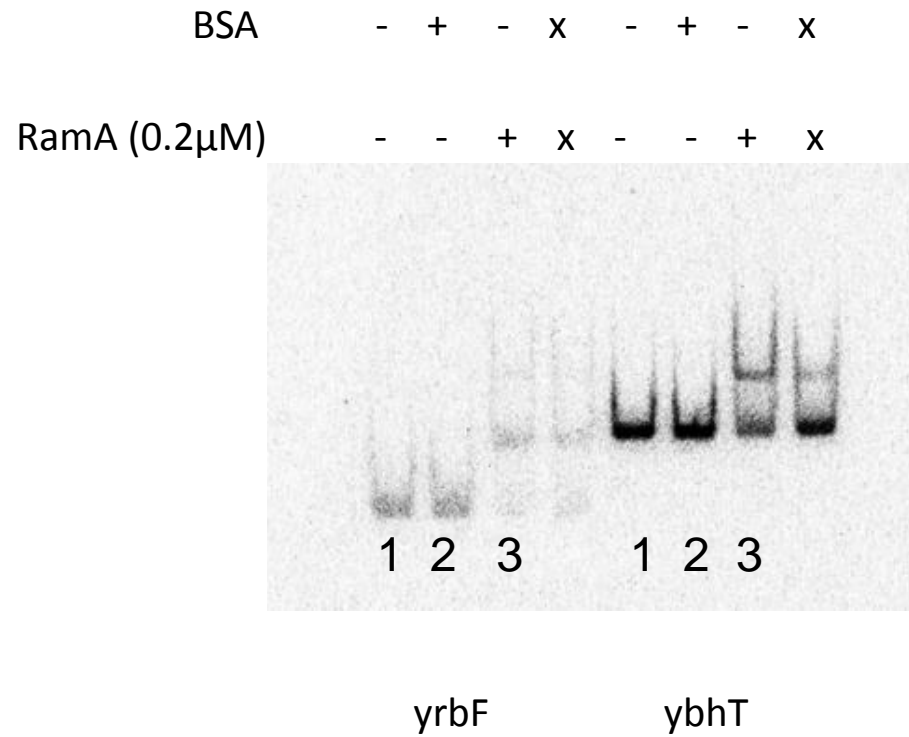

2013-2-22
